# Supplementary material for: Compatibility of Insecticides with Rice Resistance to Planthoppers as Influenced by the Timing and Frequency of Applications
Source: MDPI journal article supplement (doi:10.3390/insects13020106), 2022-01-18
Supplement: s1 [file s1]

# Compatibility of insecticides with rice resistance to planthoppers as influenced by the timing and frequency of applications

Finbarr G. Horgan <sup>1,2,3\*</sup> and Ainara Peñalver-Cruz <sup>4,5</sup>

<sup>1</sup> EcoLaVerna Integral Restoration Ecology, Bridestown, Kildinan, County Cork, T56 P499, Ireland

<sup>2</sup> Centre for Pesticide Suicide Prevention, University/BHF Centre for Cardiovascular Science, University of Edinburgh, Edinburgh EH16 4TJ, UK

<sup>3</sup> Escuela de Agronomía, Facultad de Ciencias Agrarias y Forestales, Universidad Católica del Maule, Casilla 7-D, 3349001-Curicó, Chile

<sup>4</sup> Institut de Génétique, Environnement et Protection des Plantes (IGEPP), Institut National de Recherche pour l'Agriculture, l'Alimentation et l'Environnement (INRAE), Institut Agro, Université de Rennes, CEDEX 49045, Angers, France; ainara.penalver@agrocampus-ouest.fr

<sup>5</sup> International Rice Research Institute, Makati 1226, Manila, Philippines

\* Correspondence: f.horgan@ecolaverna.org

## Supplementary Information

**Table S1:** Planthopper density (number per g plant) on IR62 and IR64 rice plants treated with one, two or three applications of each of seven insecticides. Results for non-treated controls are also presented. The proportions of plants surviving are also indicated. All plants were infested with four gravid female BPH at 40 DAS and again with two gravid females at 60 DAS. Numbers are means  $\pm$  SEM

| Variety and Insecticide | Number of Applications | Proportion of Plants Surviving <sup>1</sup> | Number of BPH per g of Plant <sup>1</sup> |
|-------------------------|------------------------|---------------------------------------------|-------------------------------------------|
| IR62                    |                        |                                             |                                           |
| Buprofezin              | 1                      | 0.60 $\pm$ 0.24 abc                         | 127.65 $\pm$ 38.04                        |
|                         | 2                      | 0.60 $\pm$ 0.24                             | 164.00 $\pm$ 61.64                        |
|                         | 3                      | 0.80 $\pm$ 0.20                             | 102.19 $\pm$ 33.47                        |
| Carbofuran              | 1                      | 0.80 $\pm$ 0.20 c                           | 320.59 $\pm$ 211.83                       |
|                         | 2                      | 1.00 $\pm$ 0.00                             | 372.38 $\pm$ 8.28                         |
|                         | 3                      | 1.00 $\pm$ 0.00                             | 0.45 $\pm$ 0.39                           |
| Cartap hydrochloride    | 1                      | 1.00 $\pm$ 0.00 abc                         | 43.13 $\pm$ 37.06                         |
|                         | 2                      | 0.60 $\pm$ 0.24                             | 31.58 $\pm$ 17.67                         |
|                         | 3                      | 0.60 $\pm$ 0.24                             | 57.48 $\pm$ 42.85                         |
| Cypermethrin            | 1                      | 1.00 $\pm$ 0.00 ab                          | 72.51 $\pm$ 23.82                         |
|                         | 2                      | 0.60 $\pm$ 0.24                             | 202.24 $\pm$ 172.39                       |



linear models using the Addelman (1974) method are as follows: variety, 1; treatment, 6; applications, 2; V×T, 5; control, 1; denominator degrees of freedom are 170. Non-significant interactions are not presented.

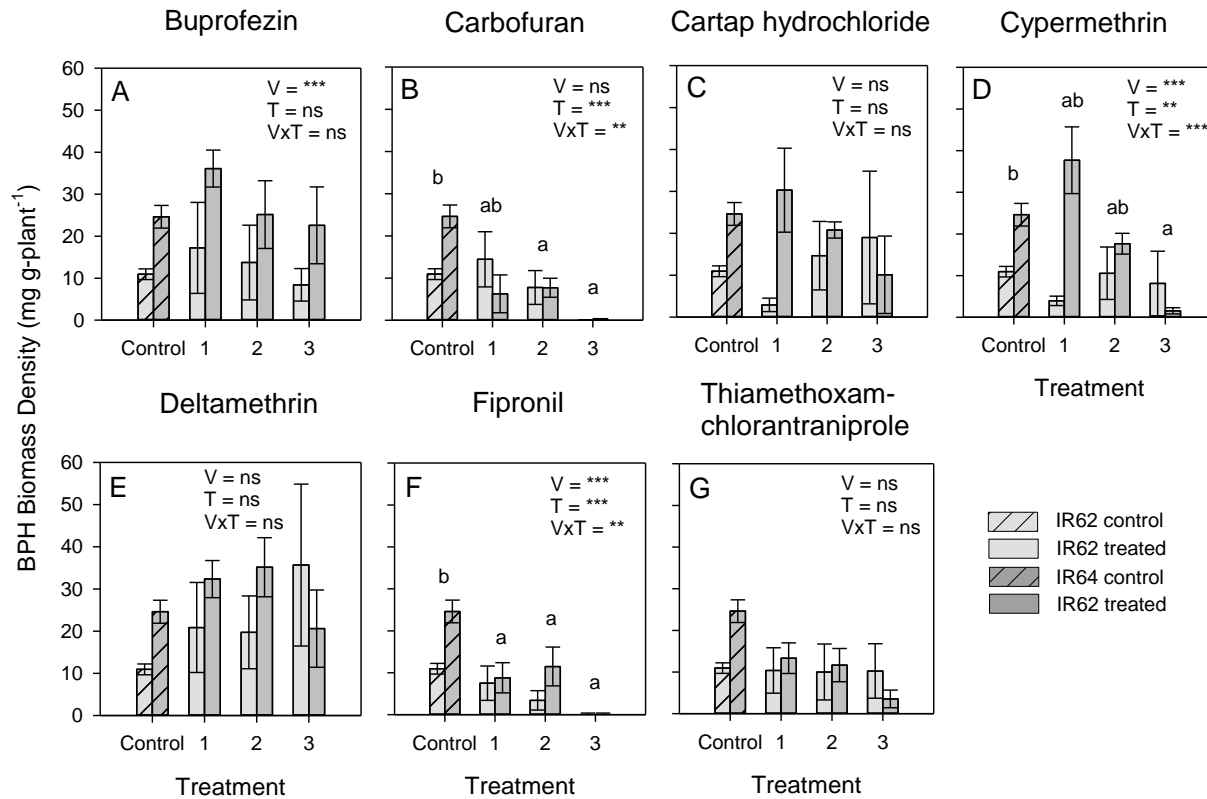

**Figure S1:** Biomass density of brown planthopper (BPH) on IR62 (resistant) and IR64 (susceptible) rice plants with 0 (control), 1, 2 or 3 applications of A) buprofezin, B) carbofuran, C) cartap hydrochloride, D) cypermethrin, E) deltamethrin, F) fipronil, or G) thiamethoxam-chlorantraniprole. Graphs are redrawn based on data presented in Figure 1 of the main text to highlight control plants versus plants treated with each insecticide. Results of univariate GLMs for each insecticide are indicated as V (variety effect), T (treatment effect, including controls), and VxT (variety x treatment interaction). Ns = not significant, \*\* =  $P \leq 0.01$ , \*\*\* =  $P \leq 0.005$ . Lowercase letters indicate homogenous treatment groups. Standard errors are indicated. For further details of analyses, see Table S2.

**Table S2:** Results from univariate GLMs for planthopper biomass density (biomass per g plant), and density (number per g plant). Results from analyses of plant survival and plant yields (weight of grain) are also presented. GLMs were conducted separately for each insecticide product. Results from comparative analyses of all seven insecticides are presented in the main text (Figure 1, Table 2)

| Parameter <sup>1</sup>           | Sources of Variation <sup>2</sup> | F-values <sup>3</sup> |                  |                      |                 |              |                   |                                  |
|----------------------------------|-----------------------------------|-----------------------|------------------|----------------------|-----------------|--------------|-------------------|----------------------------------|
|                                  |                                   | Buprofezin            | Carbofuran       | Cartap Hydrochloride | Cypermethrin    | Deltamethrin | Fipronil          | Thiamethoxam + Chlorantraniprole |
| Biomass density (mg per g plant) | Variety (V)                       | 10.020***             | 0.673ns          | 3.079ns              | 14.272***       | 1.120ns      | 11.474***         | 1.230ns                          |
|                                  | Treatment (T)                     | 0.953ns               | 9.848*** (LC***) | 0.108ns              | 4.607** (LC***) | 0.402ns      | 17.288*** (LC***) | 2.529ns                          |
|                                  | V×T                               | 0.109ns               | 4.243**          | 1.751ns              | 6.399***        | 1.255ns      | 3.897**           | 2.213ns                          |
| Density (number per g plant)     | Variety (V)                       | 1.407ns               | 1.747ns          | 6.258**              | 2.752ns         | 3.049ns      | 0.317ns           | 0.630ns                          |
|                                  | Treatment (T)                     | 0.359ns               | 0.914ns          | 1.801ns              | 5.088**         | 1.169ns      | 3.569* (LC***)    | 0.596ns                          |
|                                  | V×T                               | 0.440ns               | 0.873ns          | 2.311ns              | 0.553ns         | 0.609ns      | 0.909ns           | 1.071ns                          |
| Plant survival (proportion)      | Variety (V)                       | 10.125***             | 5.738*           | 6.946**              | 34.290***       | 11.340***    | 5.833*            | 0.001ns                          |
|                                  | Treatment (T)                     | 0.458ns               | 2.678ns          | 0.868ns              | 0.744ns         | 1.260ns      | 3.967*            | 1.152ns                          |
|                                  | V×T                               | 0.792ns               | 3.290*           | 0.868ns              | 1.826ns         | 1.260ns      | 4.589**           | 5.070**                          |
| Yield (g per plant) - infested   | Variety (V)                       | 24.825***             | 0.559ns          | 14.587***            | 135.476***      | 19.177***    | 1.738ns           | 0.469ns                          |
|                                  | Treatment (T)                     | 0.330ns               | 8.668*** (LC***) | 0.976ns              | 1.106ns         | 0.146ns      | 5.769*** (LC***)  | 1.251ns                          |
|                                  | V×T                               | 0.295ns               | 2.795*           | 1.044ns              | 0.816ns         | 0.439ns      | 2.790*            | 1.628ns                          |

1: Means for density and plant survival are presented in Table S1; means for biomass density are presented in Figures 1 and Figure S1; means for yield are presented in Table 2 and Figure S2

2: Degrees of freedom for variety = 1,28; treatment = 3,28; and V×T interaction = 3,28. Block effects are not presented

3: ns = P > 0.05; \* = P ≤ 0.05; \*\* = P ≤ 0.01; \*\*\* = P ≤ 0.001; LC = significant linear contrast

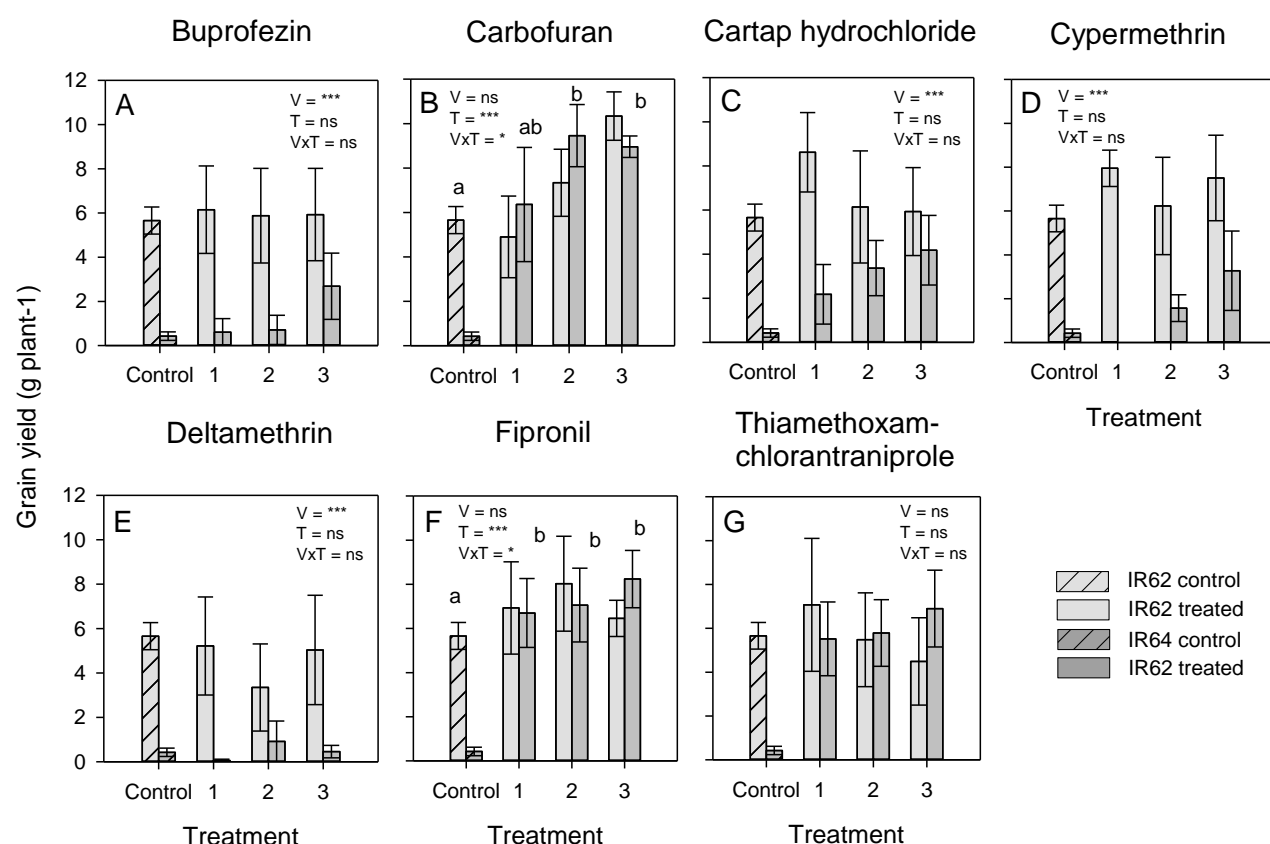

**Figure S2:** Grain production (yields) for IR62 (resistant) and IR64 (susceptible) rice plants with 0 (control), 1, 2 or 3 applications of A) buprofezin, B) carbofuran, C) cartap hydrochloride, D) cypermethrin, E) deltamethrin, F) fipronil, or G) thiamethoxam + chlorantraniprole. Graphs are redrawn based on data presented in Table 2 of the main text to highlight control plants versus plants treated with each insecticide. Results of univariate GLMs for each insecticide are indicated as V (variety effect), T (treatment effect, including controls), and VxT (variety x treatment interaction). ns =  $P > 0.05$ , \* =  $P \leq 0.05$ , \*\*\* =  $P \leq 0.005$ . Lowercase letters indicate homogenous treatment groups. Standard errors are indicated. For further details of analyses, see Table S2











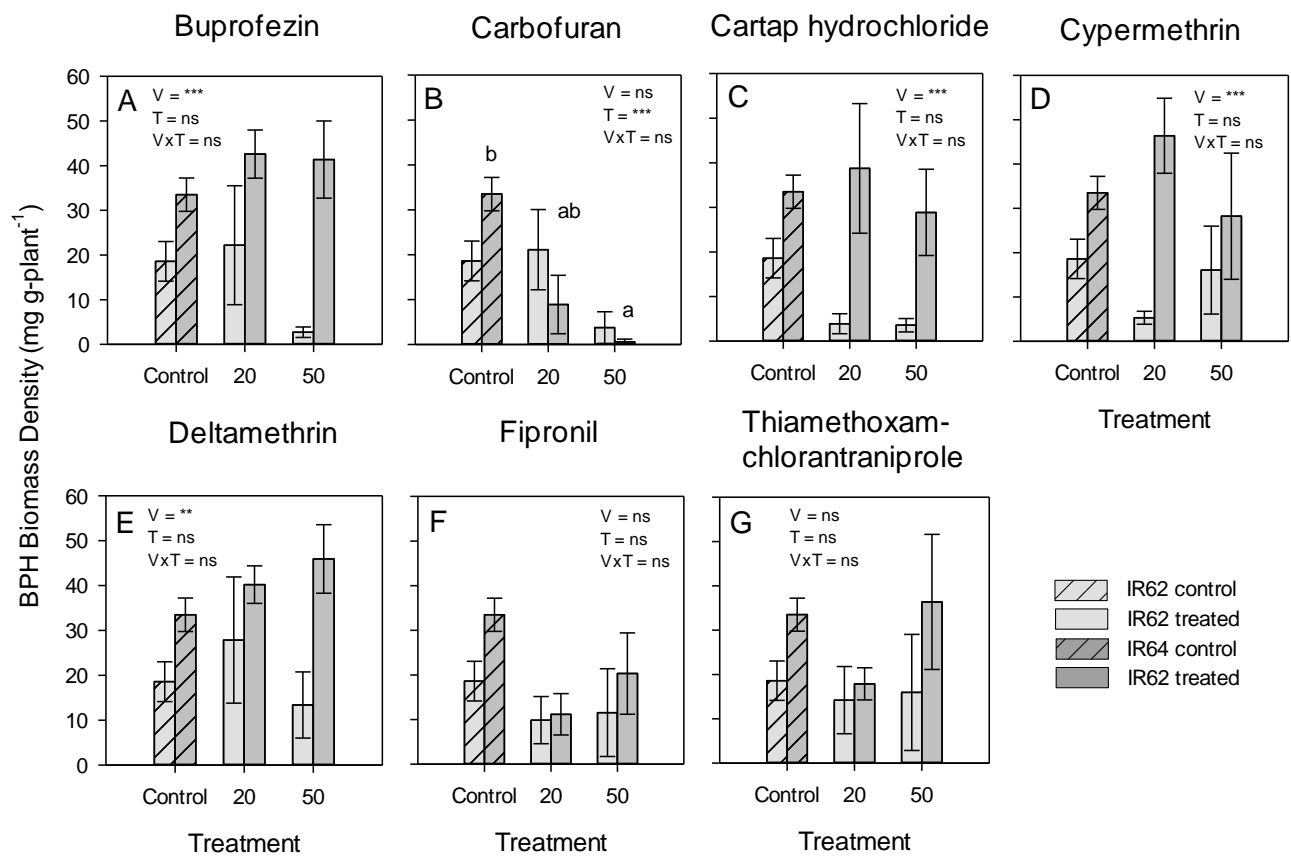

**Figure S3:** Biomass density of brown planthopper (BPH) on IR62 (resistant) and IR64 (susceptible) rice plants with 0 applications (control), and with applications at 20 and 50 DAS of A) buprofezin, B) carbofuran, C) cartap hydrochloride, D) cypermethrin, E) deltamethrin, F) fipronil, or G) thiamethoxam + chlorantraniprole. Graphs are redrawn based on data presented in Figure 1 of the main text to highlight control plants versus plants treated with each insecticide. Results of univariate GLMs for each insecticide are indicated as V (variety effect), T (treatment effect, including controls), and VxT (variety x treatment interaction). ns =  $P > 0.05$ , \*\* =  $P \leq 0.01$ , \*\*\* =  $P \leq 0.005$ . Lowercase letters indicate homogenous treatment groups. Standard errors are indicated. For further details of analyses, see Table S6.

**Table S6:** Results from univariate GLMs for planthopper biomass density (biomass per g plant), and density (number per g plant). Results from analyses of plant survival and plant yields (weight of grain) are also presented. GLMs were conducted separately for each insecticide product. Results from comparative analyses of all seven insecticides are presented in the main text (Figure 3, Table 3)

| Parameters <sup>1</sup>          | Sources of Variation <sup>2</sup> | F-values <sup>3</sup> |            |                      |              |              |          |                                  |
|----------------------------------|-----------------------------------|-----------------------|------------|----------------------|--------------|--------------|----------|----------------------------------|
|                                  |                                   | Buprofezin            | Carbofuran | Cartap hydrochloride | Cypermethrin | Deltamethrin | Fipronil | Thiamethoxam + chlorantraniprole |
| Biomass density (mg per g plant) | Variety (V)                       | 20.791***             | 0.001ns    | 16.971***            | 10.750***    | 8.876**      | 2.218ns  | 2.614ns                          |
|                                  | Treatment (T)                     | 1.244ns               | 9.189***   | 0.874ns              | 0.135ns      | 0.476ns      | 2.649ns  | 0.696ns                          |
|                                  | VxT                               | 7.761ns               | 3.071ns    | 0.899ns              | 1.768ns      | 0.901ns      | 0.493ns  | 0.376ns                          |
| Density (number per g plant)     | Variety (V)                       | 10.868***             | 1.287ns    | 17.894***            | 4.329*       | 0.623ns      | 0.004ns  | 1.766ns                          |
|                                  | Treatment (T)                     | 0.379ns               | 2.827ns    | 0.520ns              | 0.963ns      | 1.331ns      | 1.550ns  | 0.407ns                          |
|                                  | VxT                               | 2.787ns               | 1.900ns    | 3.151ns              | 0.900ns      | 0.074ns      | 0.586ns  | 0.368ns                          |
| Plant survival (proportion)      | Variety (V)                       | 19.756***             | 0.192ns    | 96.000***            | 12.549***    | 13.913***    | 0.192ns  | 2.254ns                          |
|                                  | Treatment (T)                     | 3.171ns               | 7.115***   | 6.000**              | 1.765ns      | 0.217ns      | 5.192**  | 1.690ns                          |
|                                  | VxT                               | 0.732ns               | 2.500ns    | 6.000**              | 2.549ns      | 0.217ns      | 2.500ns  | 0.563ns                          |
| Yield (g per plant) - infested   | Variety (V)                       | 49.461***             | 0.799ns    | 34.694***            | 14.426***    | 22.893***    | 3.296ns  | 3.658ns                          |
|                                  | Treatment (T)                     | 3.109ns               | 4.129*     | 3.501*               | 1.009ns      | 0.096ns      | 4.560*   | 2.233ns                          |
|                                  | VxT                               | 1.488ns               | 1.222ns    | 0.599ns              | 2.874ns      | 0.270ns      | 0.868ns  | 0.230ns                          |

1: Means for density and plant survival are presented in Table S5; means for biomass density are presented in Figure 3 and Figure S3; means for yield are presented in Table 3 and Figure S4

2: Degrees of freedom for variety = 1,20; treatment = 3,20; and V×T interaction = 3,20. Block effects are not presented

3: ns = P > 0.05; \* = P ≤ 0.05; \*\* = P ≤ 0.01; \*\*\* = P ≤ 0.05

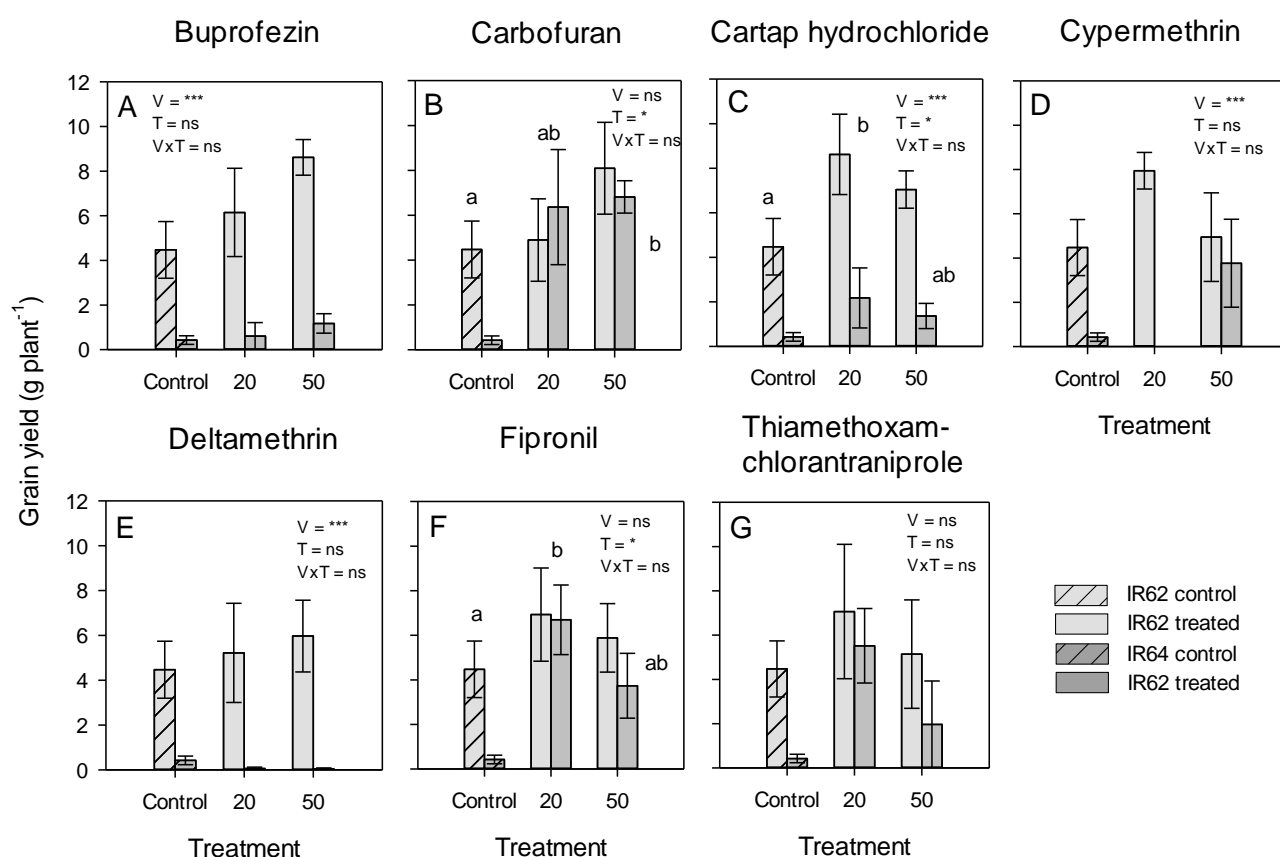

**Figure S4:** Grain production (yields) for IR62 (resistant) and IR64 (susceptible) rice plants with 0 applications (control), and with applications at 20 and 50 DAS of A) buprofezin, B) carbofuran, C) cartap hydrochloride, D) cypermethrin, E) deltamethrin, F) fipronil, or G) thiamethoxam + chlorantraniprole. Graphs are redrawn based on data presented in Table 3 of the main text to highlight control plants versus plants treated with each insecticide. Results of univariate GLMs for each insecticide are indicated as V (variety effect), T (treatment effect, including controls), and VxT (variety x treatment interaction). Ns =  $P > 0.05$ , \* =  $P \leq 0.05$ , \*\*\* =  $P \leq 0.005$ . Lowercase letters indicate homogenous treatment groups. Standard errors are indicated. For further details of analyses, see Table S6.
